# Supplementary material for: Sulfur atom modification on thymine improves the specificity and sensitivity of DNA polymerization and detection
Source: Royal Society of Chemistry journal article supplement (doi:10.1039/d1an02017j), 2022-01-01
Supplement: d1an02017j1.pdf [file d1an02017j1.pdf]

# Sulfur atom modification on thymine improves the specificity and sensitivity of DNA polymerization

Yang Li<sup>1</sup>, Wen Sun<sup>1</sup>, Danyan Luo<sup>2</sup>, Zhaoyi Yang<sup>2</sup>, Wei He<sup>3</sup>, Zhen Huang<sup>1,2\*</sup>

<sup>1</sup> Key Laboratory of Bio-Resource and Eco-environment of Ministry of Education, College of Life Sciences, Sichuan University, Chengdu, Sichuan, 610064, P.R. China;

<sup>2</sup> SeNA Research Institute and Szostak-CDHT Large Nucleic Acids Institute, Chengdu, Sichuan, 610041, P.R. China;

<sup>3</sup> Sichuan International Travel Healthcare Center and Port Clinic of Chengdu Customs, Chengdu, Sichuan, China.

\*Email: [huang@senaresearch.org](mailto:huang@senaresearch.org)

## Supporting information

ORF1ab gene sequence:

5'-

GGGACAACCAUACACUAAUUGUGUUAAGAUGUUGUGUACACACACUGGUACUGGUCAGGCAAUAA  
CAGUACACCGGAAGCCAAUAUGGAUCAAGAAUCCUUGGUGGUGCAUCGUGUUGUCUGUACUGC  
CGUUGCCACAUAGAUAUCCAAAUCCUAAAGGAUUUUGUGACUUAAAAGGUAAGUAUGUACAAAU  
ACCUACAACUUGUGCUAAUGACCCUGUGGGUUUUACACUUAAAAACACAGUCUGUACCGUCUGCG  
GUAUGUGGAAAGGUUAUGGCUGUAGUUGUGAUCAACUCCGCGAACCCAUGCUUCAGUCAGCUGAU  
GCACAAUCGUUUUAAACGGGUUUGCGGUGUAAGUGCAGCCCGUCUUACACCGUGCGGCACAGGC  
ACUAGUACUGAUGUCGUUAUACAGGGCUUUUGACAUCUACAAUGAUAAAGUAGCUGGUUUUGCUAA  
AUUCCUAAAAACUAAUUGUUGUCGUUCCAAGAAAAGGACGAAGAUGACAAUUUAAUUGAUUCUU  
ACUUUGUAGUUAAGA-3'

N gene sequence:

5'-

AUGAUGAACCGACGACGACUACUAGCGUGCCUUUGUAAGCACAAGCUGAUGAGUACGAACUUAUG  
UACUCAUUCGUUUCGGAAGAGACAGGUACGUUAAUAGUUAUAGCGUACUUCUUUUUCUUGCUUU  
CGUGGUAUUCUUGCUAGUUACACUAGCCAUCCUACUGCGCUUCGAUUGUGUGCGUACUGCUGCA  
AUAUUGUUAACGUGAGUCUUGUAAACCUUCUUUUUACGUUUACUCUCGUGUAAAAAUCUGAAUU  
CUUCUAGAGUCCUGAUCUUCUGGUCUAAACGAACUAAA-3'

| Target gene | Primer   | Sequence (5' to 3')         | Label           |
|-------------|----------|-----------------------------|-----------------|
| ORF1ab      | ORF1ab-F | CCCTGTGGGTTTACACTTAA        | □               |
|             | ORF1ab-R | ACGATTGTGCATCAGCTGA         | □               |
|             | ORF1ab-P | CCGTCTGCGGTATGTGGAAGGTTATGG | 5'-FAM, 3'BHQ1  |
| N           | N-F      | GGGGAACCTCTCCTGCTAGAAT      | □               |
|             | N-R      | CAGACATTTTGCTCTCAAGCTG      | □               |
|             | N-P      | TTGCTGCTGCTTGACAGATT        | 5'-FAM, 3'TAMRA |

## Gel Analysis of Canonical and S-modified DNAs

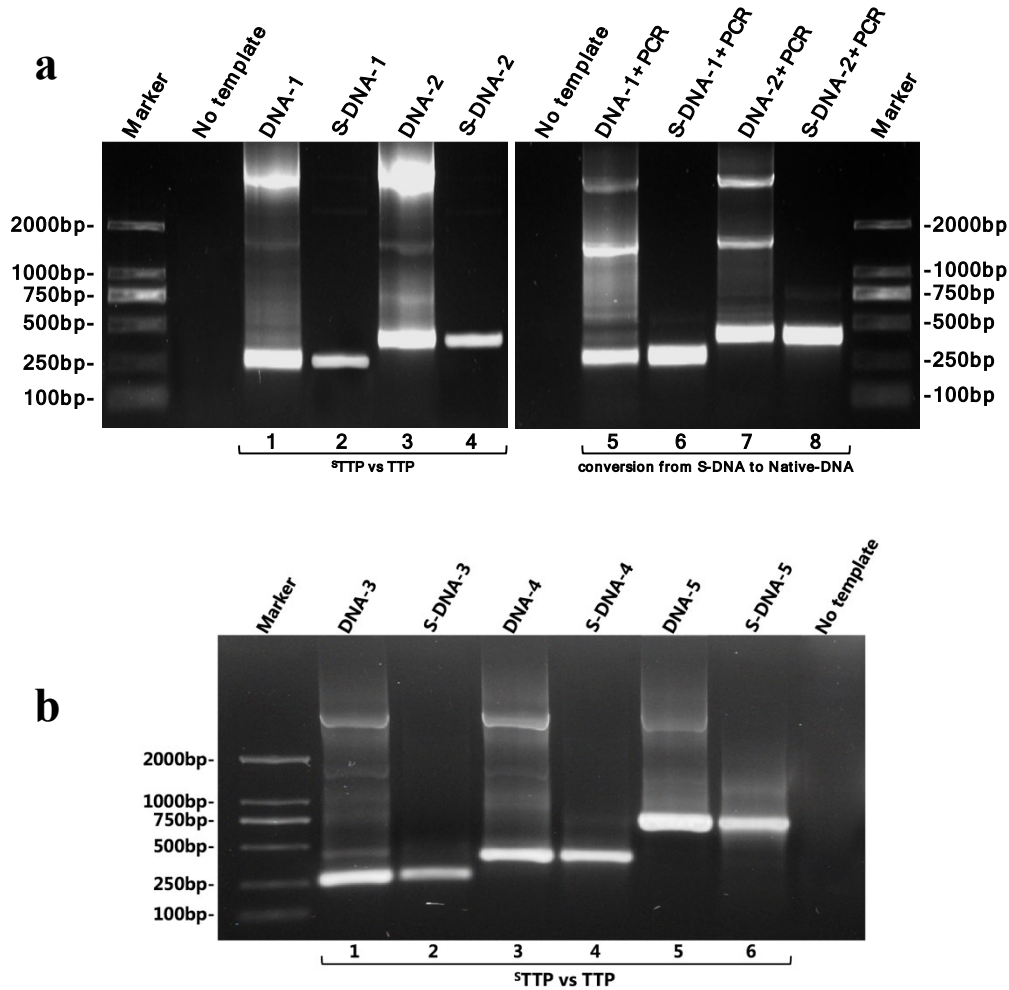

**Figure S1.** Inhibition of non-specific DNA amplification with <sup>s</sup>TTP; **a.** agarose gel analysis of the canonical and S-modified DNAs after PCR amplification. DNA-1 template was prepared by PCR with canonical dNTPs, plasmid pFS 255 and DNA-1 primers (forward primer: 5'-CCTCTTCCGACCATCAAGCAT-3'; reverse primer: 5'-CGTCATCAAAATCACTCGCATCAAC-3'); DNA-2 template was prepared by PCR with canonical dNTPs, plasmid pFS 255 and DNA-2 primers (forward primer: 5'-CCTCTTCCGACCATCAAGCAT-3'; reverse primer: 5'-ACAACCTATTAATTTCCCTCGTC-3'); In Lane 1, 30-cycle PCR was performed with DNA-1 template and canonical TTP with the other dNTPs; In Lane 2, 30-cycle PCR was performed with DNA-1 template and <sup>s</sup>TTP with the other dNTPs; In Lane 3, 30-cycle PCR was performed with DNA-2 template and canonical TTP with the other dNTPs; In Lane 4, 30-cycle PCR was performed with DNA-2 template and <sup>s</sup>TTP with the other dNTPs; In Lane 5, 10-cycle PCR was performed with canonical dNTPs and the PCR product (from Lane 1 and after 50-times dilution) as template; In Lane 6, 10-cycle PCR was performed with canonical dNTPs and the PCR product (from Lane 2 and after 50-times dilution) as template; In Lane 7, 10-cycle PCR was performed with canonical dNTPs and the PCR product (from Lane 3 and after 50-times dilution) as template; In Lane 8, 10-cycle PCR was performed with canonical dNTPs and the PCR product (from Lane 4 and after 50-times dilution) as template. **b.** PCR amplification results

using the other three templates.

## Sequenced Canonical and S-modified DNAs from PCR

**DNA-1 (1-100):** 1-

TGGTTACTCACCCTGCGATCCCCGGCAAAACAGCATTCCAGGTATTAGAAGAATATCCTGATTCAGGTGAAAATATTGTTGATGCGCTGGCA  
GTGTTCC-100

**S-DNA-1 (1-100):** 1-

TGGTTACTCACCCTGCGATCCCCGGCAAAACAGCATTCCAGGTATTAGAAGAATATCCTGATTCAGGTGAAAATATTGTTGATGCGCTGGCA  
GTGTTCC-100

**DNA-1 (101-200):** 101-

TGCGCCGGTTGCATTTCGATTCCTGTTTGAATTGTCCTTTAACAGCGATCGCGTATTTCTGCTCGCTCAGGCGCAATCACGAATGAATAACGG  
TTTGGT-200

**S-DNA-1 (101-200):** 101-

TGCGCCGGTTGCATTTCGATTCCTGTTTGAATTGTCCTTTAACAGCGATCGCGTATTTCTGCTCGCTCAGGCGCAATCACGAATGAATAACGG  
TTTGGT-200

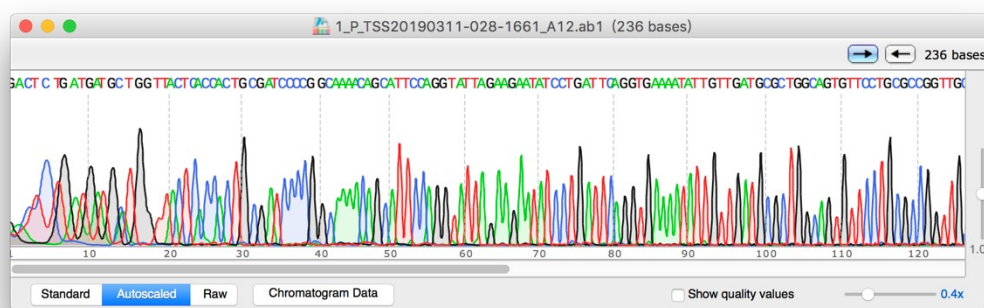

**Figure S2.** Sanger sequencing result of DNA-1. In DNA-1 experiment, the PCR DNA was prepared with DNA-1 template, DNA-1 primers, TTP, and the other canonical dNTPs. The PCR DNA-1 was sequenced, and the resulted sequence was identical to template DNA-1.

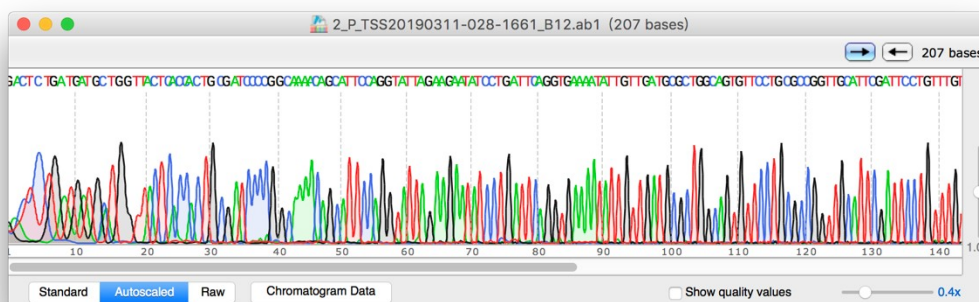

**Figure S3.** Sanger sequencing result of S-DNA-1. In S-DNA-1 experiment, the PCR DNA was prepared with DNA-1 template, DNA-1 primers, <sup>s</sup>TTP, and the other canonical dNTPs. The PCR S-DNA-1 was sequenced, and the resulted sequence was identical to template DNA-1.

**DNA-2 (100-100):** 1-  
 TGGTTACTCACCCTGCGATCCCCGGCAAAACAGCATTCCAGGTATTAGAAGAATATCCTGATTCAGGTGAAAATATTGTTGATGCGCTGGCA  
 GTGTTCC-100

**S-DNA-2 (100-100):** 1-  
 TGGTTACTCACCCTGCGATCCCCGGCAAAACAGCATTCCAGGTATTAGAAGAATATCCTGATTCAGGTGAAAATATTGTTGATGCGCTGGCA  
 GTGTTCC-100

**DNA-2 (101-200):** 101-  
 TGCGCCGGTTGCATTTCGATTCTGTTTGTAAATTGTCCTTTTAACAGCGATCGCGTATTTTCGTCTCGCTCAGGCGCAATCACGAATGAATAACGG  
 TTTGGT-200

**S-DNA-2 (101-200):** 101-  
 TGCGCCGGTTGCATTTCGATTCTGTTTGTAAATTGTCCTTTTAACAGCGATCGCGTATTTTCGTCTCGCTCAGGCGCAATCACGAATGAATAACGG  
 TTTGGT-200

**DNA-2 (201-300):** 201-  
 TGATGCGAGTGATTTTGATGACGAGCGTAATGGCTGGCCTGTTGAACAAGTCTGGAAAGAAATGCATAAGCTTTTGCCATTCTCACCGGATTC  
 AGTCGTC-300

**S-DNA-2 (201-300):** 201-  
 TGATGCGAGTGATTTTGATGACGAGCGTAATGGCTGGCCTGTTGAACAAGTCTGGAAAGAAATGCATAAGCTTTTGCCATTCTCACCGGATTC  
 AGTCGTC-300

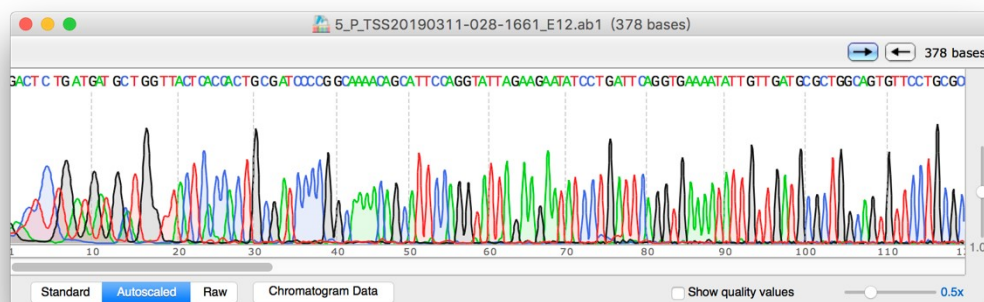

**Figure S4.** Sanger sequencing result of DNA-2. In DNA-2 experiment, the PCR DNA was prepared with DNA-2 template, DNA-2 primers, TTP, and the other canonical dNTPs. The PCR DNA-2 was sequenced, and the resulted sequence was identical to template DNA-2.

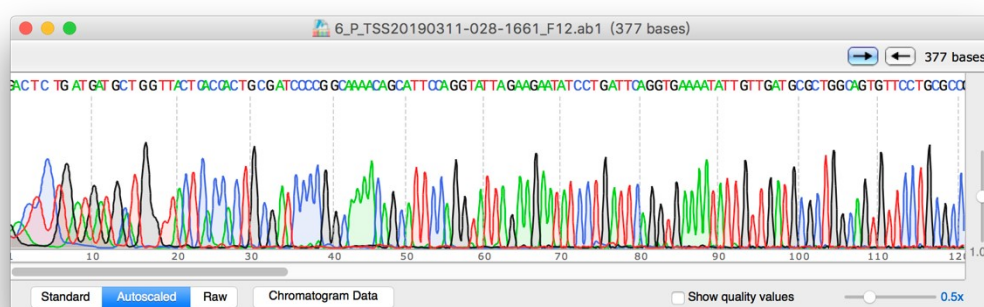

**Figure S5.** Sanger sequencing result of S-DNA-2. In S-DNA-2 experiment, the PCR DNA was prepared with DNA-2 template, DNA-2 primers, <sup>s</sup>TTP, and the other canonical dNTPs. The PCR S-DNA-2 was sequenced, and the resulted sequence was identical to template DNA-2.

**DNA-1/PCR (1-100):** 1-

TGGTTACTCACCACCTGCGATCCCCGGCAAAACAGCATTCCAGGTATTAGAAGAATATCCTGATTCAGGTGAAAATATTGTTGATGCGCTGGCA  
GTGTTCC-100

**S-DNA-1/PCR (1-100):** 1-

TGGTTACTCACCACCTGCGATCCCCGGCAAAACAGCATTCCAGGTATTAGAAGAATATCCTGATTCAGGTGAAAATATTGTTGATGCGCTGGCA  
GTGTTCC-100

**DNA-1/PCR (101-200):** 101-

TGCGCCGGTTGCATTGCTTCTGTTTGAATTGTCCTTTTAACAGCGATCGCGTATTTTCGTCTCGCTCAGGCGCAATCACGAATGAATAACGG  
TTTGGT-200

**S-DNA-1/PCR (101-200):** 101-

TGCGCCGGTTGCATTGCTTCTGTTTGAATTGTCCTTTTAACAGCGATCGCGTATTTTCGTCTCGCTCAGGCGCAATCACGAATGAATAACGG  
TTTGGT-200

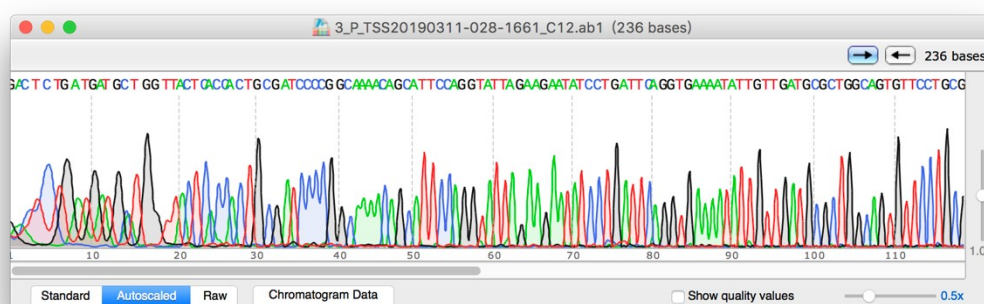

**Figure S6.** Sanger sequencing result of DNA-1/PCR. In the experiment, the DNA-1/PCR was prepared with PCR DNA-1 (as template, after 50-times dilution) from **Figure S2**, DNA-1 primers, and all canonical dNTPs. The DNA-1/PCR was sequenced, and the resulted sequence was identical to template DNA-1.

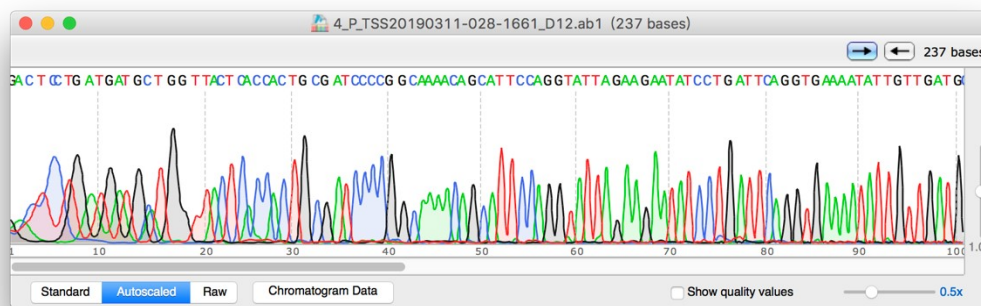

**Figure S7.** Sanger sequencing result of S-DNA-1/PCR. In the experiment, the S-DNA-1/PCR was prepared with PCR S-DNA-1 (as template, after 50-times dilution) from **Figure S3**, DNA-1 primers, and all canonical dNTPs. The S-DNA-1/PCR was sequenced, and the resulted sequence was identical to template DNA-1.

**DNA-2/PCR (1-100):** 1-

TGGTTACTCACCCTGCGATCCCCGGCAAAACAGCATTCCAGGTATTAGAAGAATATCCTGATTCAGGTGAAAATATTGTTGATGCGCTGGCA GTGTTCC-100

**S-DNA-2/PCR (1-100):** 1-

TGGTTACTCACCCTGCGATCCCCGGCAAAACAGCATTCCAGGTATTAGAAGAATATCCTGATTCAGGTGAAAATATTGTTGATGCGCTGGCA GTGTTCC-100

**DNA-2/PCR (101-200):** 101-

TGCGCCGTTGCATTCGATTCCTGTTTGAATTGTCCTTTTAACAGCGATCGCGTATTTTCGTCCTCGCTCAGGCGCAATCACGAATGAATAACGG TTTGGT-200

**S-DNA-2/PCR (101-200):** 101-

TGCGCCGTTGCATTCGATTCCTGTTTGAATTGTCCTTTTAACAGCGATCGCGTATTTTCGTCCTCGCTCAGGCGCAATCACGAATGAATAACGG TTTGGT-200

**DNA-2/PCR (201-300):** 201-

TGATGCGAGTGATTTTGATGACGAGCGTAATGGCTGGCCTGTTGAACAAGTCTGGAAAGAAATGCATAAGCTTTTGCCATTCTCACCGGATTC AGTCGTC-300

**S-DNA-2/PCR (201-300):** 201-

TGATGCGAGTGATTTTGATGACGAGCGTAATGGCTGGCCTGTTGAACAAGTCTGGAAAGAAATGCATAAGCTTTTGCCATTCTCACCGGATTC AGTCGTC-300

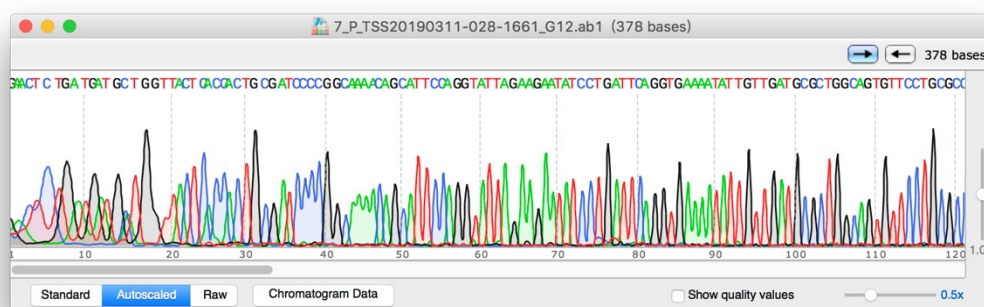

**Figure S8.** Sanger sequencing result of DNA-2/PCR. In the experiment, the DNA-2/PCR was prepared with PCR DNA-2 (as template, after 50-times dilution) from **Figure S4**, DNA-2 primers, and all canonical dNTPs. The DNA-2/PCR was sequenced, and the resulted sequence was identical to template DNA-2.

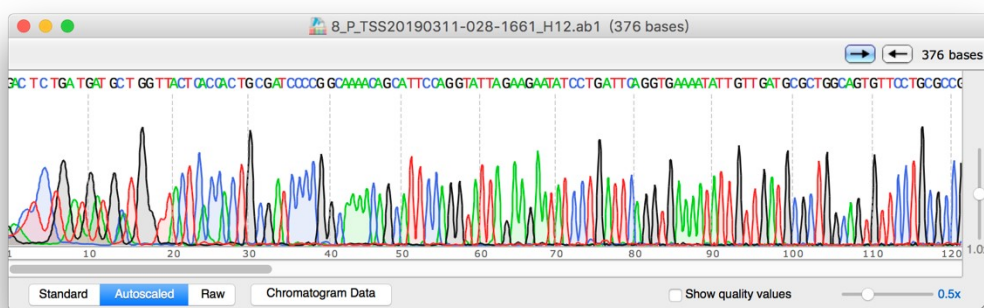

**Figure S9.** Sanger sequencing result of S-DNA-2/PCR. In the experiment, the S-DNA-2/PCR was prepared with PCR S-DNA-2 (as template, after 50-times dilution) from **Figure S5**, DNA-2 primers, and all canonical dNTPs. The S-DNA-2/PCR was sequenced, and the resulted sequence was identical to template DNA-2.



## Page Analysis of Canonical and S-modified DNAs

**Primer:** 5'-CGTCTTGGCC-3'

**Template1:** 3'-GCAGAACCGTCGCTTCCTCTTC-5'

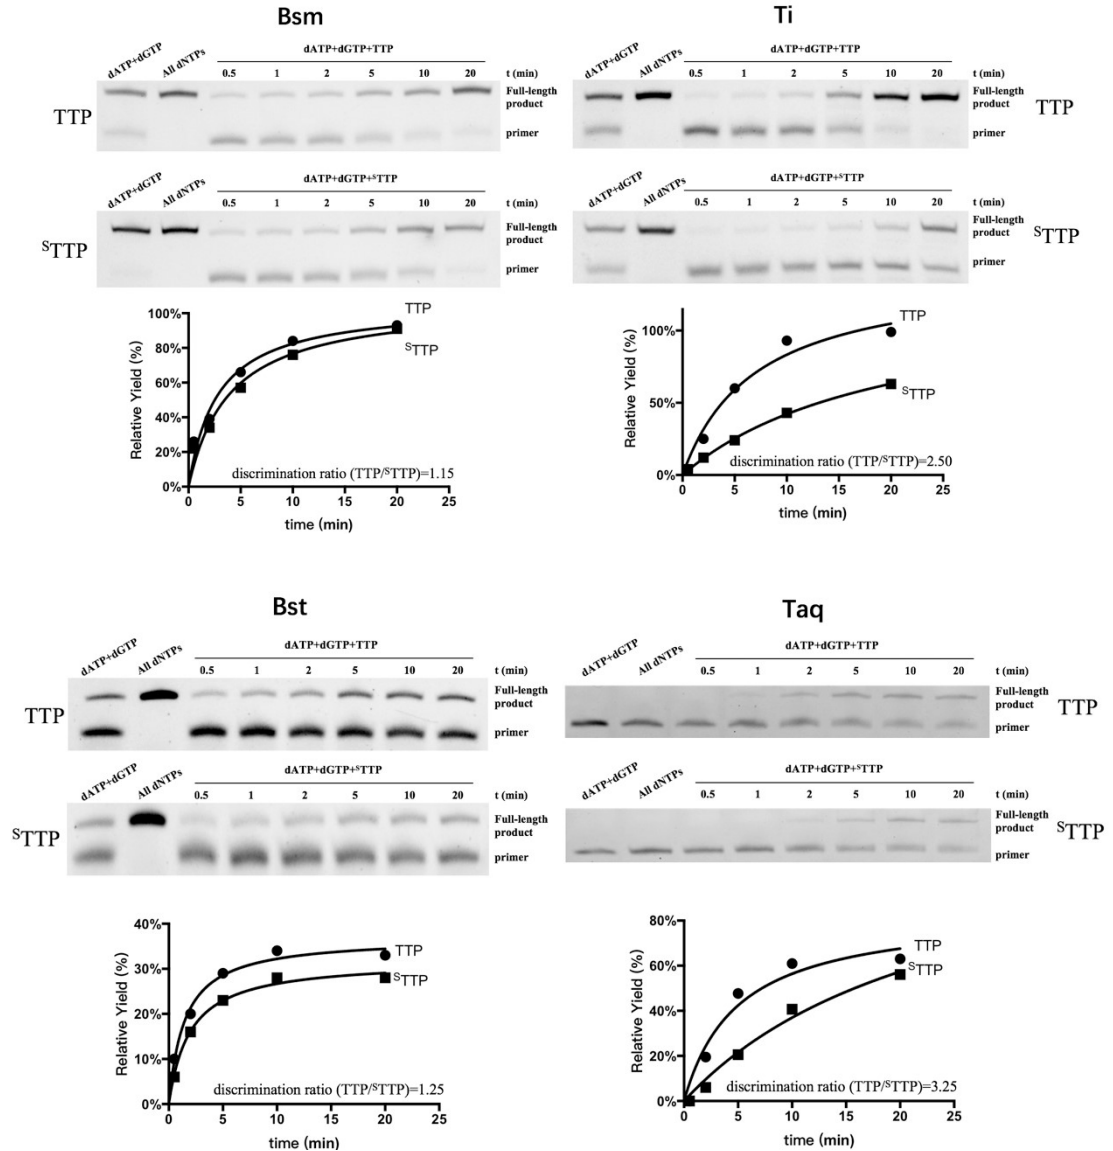

**Figure S10.** Improving DNA polymerization specificity by <sup>S</sup>TTP. The products of DNA extension reactions were analyzed by denaturing PAGE, offering the bands of single-stranded DNAs. Four DNA polymerases (Bsm, Ti, Bst and Taq) were used in these experiments.
